# Supplementary material
Source: PubMed Central journal article supplement (PMC3278676)
Supplement: supp_bjr097_bjr097_suppl_table1.pdf [file supp_bjr097_bjr097_suppl_table1.pdf]

**Supplementary Table 1: Polymorphisms in odorant receptor loci.**

| Locus        | Location           | Polymorphism <sup>1</sup> | Amino acid change | Frequency <sup>2</sup> |
|--------------|--------------------|---------------------------|-------------------|------------------------|
| <i>Or22a</i> | Upstream Genomic   | T-240A                    |                   | 0.342                  |
| <i>Or22a</i> | Upstream Genomic   | T-154A                    |                   | 0.368                  |
| <i>Or22a</i> | Upstream Genomic   | A-140G                    |                   | 0.368                  |
| <i>Or22a</i> | Upstream Genomic   | T-111A                    |                   | 0.368                  |
| <i>Or22a</i> | Upstream Genomic   | C-4T                      |                   | 0.105                  |
| <i>Or22a</i> | Exon 1             | C22T                      |                   | 0.105                  |
| <i>Or22a</i> | Exon 1             | A27T                      | H8Y               | 0.342                  |
| <i>Or22a</i> | Exon 1             | C60G                      |                   | 0.342                  |
| <i>Or22a</i> | Exon 1             | C61A                      |                   | 0.342                  |
| <i>Or22a</i> | Exon 1             | G87C                      |                   | 0.289                  |
| <i>Or22a</i> | Exon 1             | G88T                      | V30L              | 0.289                  |
| <i>Or22a</i> | Exon 1             | A113T                     | E38V              | 0.053                  |
| <i>Or22a</i> | Intron 1           | A140G                     |                   | 0.053                  |
| <i>Or22a</i> | Intron 1           | G143C                     |                   | 0.053                  |
| <i>Or22a</i> | Intron 1           | 169 Del 2090 bp           |                   | 0.395                  |
| <i>Or22a</i> | Exon 2             | G212T                     | W51L              | 0.053                  |
| <i>Or22a</i> | Exon 2             | G237A                     | M59I              | 0.053                  |
| <i>Or22a</i> | Exon 2             | A261G                     | I67M              | 0.105                  |
| <i>Or22a</i> | Exon 2             | A337G                     | M93V              | 0.079                  |
| <i>Or22a</i> | Exon 2             | A358T                     | S100C             | 0.237                  |
| <i>Or22a</i> | Exon 2             | C647A                     | A196E             | 0.211                  |
| <i>Or22a</i> | Exon 2             | T663G                     | D201E             | 0.132                  |
| <i>Or22a</i> | Intron 2           | C929G                     |                   | 0.105                  |
| <i>Or22a</i> | Exon 4             | A1398G                    | T382A             | 0.105                  |
| <i>Or22a</i> | Exon 4 UTR         | T1486A                    |                   | 0.053                  |
| <i>Or22a</i> | Downstream Genomic | C1614T                    |                   | 0.053                  |
| <i>Or22b</i> | Exon 1             | G73A                      | I25L              | 0.105                  |
| <i>Or22b</i> | Exon 1             | A81G                      |                   | 0.105                  |
| <i>Or22b</i> | Intron 1           | A181G                     |                   | 0.316                  |
| <i>Or22b</i> | Intron 1           | G183A                     |                   | 0.316                  |
| <i>Or22b</i> | Intron 1           | A184C                     |                   | 0.316                  |
| <i>Or22b</i> | Intron 1           | T185C                     |                   | 0.316                  |
| <i>Or22b</i> | Exon 2             | T240C                     |                   | 0.053                  |
| <i>Or22b</i> | Exon 2             | G282A                     |                   | 0.316                  |

|              |                    |               |       |       |
|--------------|--------------------|---------------|-------|-------|
| <i>Or22b</i> | Exon 2             | A334G         | N92D  | 0.316 |
| <i>Or22b</i> | Exon 2             | C591T         |       | 0.132 |
| <i>Or22b</i> | Exon 2             | T639C         |       | 0.316 |
| <i>Or22b</i> | Exon 2             | G641T         | R194M | 0.447 |
| <i>Or22b</i> | Exon 2             | C654A         |       | 0.132 |
| <i>Or22b</i> | Exon 2             | A662C         | D201A | 0.316 |
| <i>Or22b</i> | Exon 2             | G697T         | V213L | 0.263 |
| <i>Or22b</i> | Exon 2             | T723C         |       | 0.447 |
| <i>Or22b</i> | Exon 2             | A765G         |       | 0.447 |
| <i>Or22b</i> | Intron 2           | T834A         |       | 0.053 |
| <i>Or22b</i> | Intron 2           | G835T         |       | 0.053 |
| <i>Or22b</i> | Intron 2           | 837 Ins 10bp  |       | 0.132 |
| <i>Or22b</i> | Intron 2           | G843C         |       | 0.132 |
| <i>Or22b</i> | Intron 2           | T860A         |       | 0.105 |
| <i>Or22b</i> | Intron 2           | 907 Del 9bp   |       | 0.105 |
| <i>Or22b</i> | Intron 2           | 935 Del 1bp   |       | 0.105 |
| <i>Or22b</i> | Intron 2           | C955A         |       | 0.053 |
| <i>Or22b</i> | Intron 2           | T960C         |       | 0.053 |
| <i>Or22b</i> | Exon 3             | C1022T        |       | 0.421 |
| <i>Or22b</i> | Exon 3             | G1046C        |       | 0.421 |
| <i>Or22b</i> | Exon 3             | T1103C        |       | 0.079 |
| <i>Or22b</i> | Exon 3             | C1154T        |       | 0.421 |
| <i>Or22b</i> | Exon 3             | C1260A        | L354I | 0.421 |
| <i>Or22b</i> | Exon 3             | C1295T        |       | 0.447 |
| <i>Or22b</i> | Exon 4 UTR         | A1480T        |       | 0.395 |
| <i>Or22b</i> | Exon 4 UTR         | C1509T        |       | 0.395 |
| <i>Or22b</i> | Exon 4 UTR         | A1515C        |       | 0.342 |
| <i>Or22b</i> | Exon 4 UTR         | 1541 Ins 16bp |       | 0.105 |
| <i>Or22b</i> | Downstream genomic | G1559T        |       | 0.053 |
| <i>Or22b</i> | Downstream genomic | T1561C        |       | 0.053 |
| <i>Or22b</i> | Downstream genomic | A1577G        |       | 0.053 |
| <i>Or22b</i> | Downstream genomic | T1638G        |       | 0.105 |
| <i>Or22b</i> | Downstream genomic | C1742T        |       | 0.079 |
| <i>Or22b</i> | Downstream genomic | G1953A        |       | 0.079 |
|              |                    |               |       |       |
| <i>Or35a</i> | Upstream genomic   | G-455A        |       | 0.211 |
| <i>Or35a</i> | Upstream genomic   | A-387T        |       | 0.395 |
| <i>Or35a</i> | Upstream genomic   | A-333T        |       | 0.368 |
| <i>Or35a</i> | Upstream genomic   | C-279G        |       | 0.395 |

|              |                    |               |       |       |
|--------------|--------------------|---------------|-------|-------|
| <i>Or35a</i> | Upstream genomic   | -276 Del 12bp |       | 0.395 |
| <i>Or35a</i> | Upstream genomic   | T-45C         |       | 0.211 |
| <i>Or35a</i> | Exon 1             | A113T         | K38I  | 0.105 |
| <i>Or35a</i> | Exon 1             | G129A         |       | 0.132 |
| <i>Or35a</i> | Exon 1             | C139G         | L47V  | 0.105 |
| <i>Or35a</i> | Exon 1             | C201T         |       | 0.132 |
| <i>Or35a</i> | Exon 1             | C372G         |       | 0.184 |
| <i>Or35a</i> | Exon 1             | G422C         |       | 0.132 |
| <i>Or35a</i> | Exon 1             | C534T         |       | 0.105 |
| <i>Or35a</i> | Exon 1             | G612T         |       | 0.132 |
| <i>Or35a</i> | Exon 1             | T619C         |       | 0.132 |
| <i>Or35a</i> | Exon 1             | A630T         |       | 0.132 |
| <i>Or35a</i> | Exon 1             | G660A         |       | 0.132 |
| <i>Or35a</i> | Exon 1             | C749T         | T250I | 0.105 |
| <i>Or35a</i> | Intron 1           | G900A         |       | 0.132 |
| <i>Or35a</i> | Intron 1           | A908T         |       | 0.132 |
| <i>Or35a</i> | Intron 1           | A920T         |       | 0.132 |
| <i>Or35a</i> | Intron 1           | A930T         |       | 0.132 |
| <i>Or35a</i> | Intron 1           | A937C         |       | 0.132 |
| <i>Or35a</i> | Intron 1           | C942T         |       | 0.132 |
| <i>Or35a</i> | Intron 1           | A968C         |       | 0.132 |
| <i>Or35a</i> | Exon 2             | T993C         |       | 0.158 |
| <i>Or35a</i> | Exon 2             | G1026A        |       | 0.132 |
| <i>Or35a</i> | Intron 2           | G1101T        |       | 0.132 |
| <i>Or35a</i> | Intron 2           | T1102C        |       | 0.132 |
| <i>Or35a</i> | Intron 2           | A1105C        |       | 0.132 |
| <i>Or35a</i> | Intron 2           | T1106A        |       | 0.132 |
| <i>Or35a</i> | Intron 2           | 1116 Ins 3 bp |       | 0.105 |
| <i>Or35a</i> | Intron 2           | 1116 Ins 2 bp |       | 0.132 |
| <i>Or35a</i> | Intron 2           | T1118A        |       | 0.132 |
| <i>Or35a</i> | Intron 2           | T1123C        |       | 0.132 |
| <i>Or35a</i> | Intron 2           | A1127G        |       | 0.132 |
| <i>Or35a</i> | Exon 3             | A1195G        | N348S | 0.053 |
| <i>Or35a</i> | Intron 3           | C1345T        |       | 0.053 |
| <i>Or35a</i> | Downstream genomic | 1449 Del 1bp  |       | 0.263 |
| <i>Or35a</i> | Downstream genomic | 1456 Del 1bp  |       | 0.053 |
| <i>Or35a</i> | Downstream genomic | G1591C        |       | 0.289 |
| <i>Or35a</i> | Downstream genomic | 1620 Ins 2bp  |       | 0.053 |
| <i>Or35a</i> | Downstream genomic | 1624 Ins 2bp  |       | 0.289 |

|              |                    |               |  |       |
|--------------|--------------------|---------------|--|-------|
| <i>Or35a</i> | Downstream genomic | A1787G        |  | 0.053 |
| <i>Or35a</i> | Downstream genomic | G1872A        |  | 0.263 |
| <i>Or35a</i> | Downstream genomic | G1934A        |  | 0.053 |
| <i>Or35a</i> | Downstream genomic | A1993T        |  | 0.079 |
| <i>Or35a</i> | Downstream genomic | 1993 Ins 1bp  |  | 0.079 |
| <i>Or35a</i> | Downstream genomic | 2035 Del 1bp  |  | 0.053 |
| <i>Or35a</i> | Downstream genomic | C2048T        |  | 0.184 |
|              |                    |               |  |       |
| <i>Or47a</i> | Upstream genomic   | T-497C        |  | 0.158 |
| <i>Or47a</i> | Upstream genomic   | T-485A        |  | 0.105 |
| <i>Or47a</i> | Upstream genomic   | G-469A        |  | 0.105 |
| <i>Or47a</i> | Upstream genomic   | G-438T        |  | 0.421 |
| <i>Or47a</i> | Upstream genomic   | A-425G        |  | 0.395 |
| <i>Or47a</i> | Upstream genomic   | A-399C        |  | 0.289 |
| <i>Or47a</i> | Upstream genomic   | A-377G        |  | 0.211 |
| <i>Or47a</i> | Upstream genomic   | G-362A        |  | 0.105 |
| <i>Or47a</i> | Upstream genomic   | -360 Del 15bp |  | 0.184 |
| <i>Or47a</i> | Upstream genomic   | C-338G        |  | 0.342 |
| <i>Or47a</i> | Upstream genomic   | C-330G        |  | 0.342 |
| <i>Or47a</i> | Upstream genomic   | C-329T        |  | 0.342 |
| <i>Or47a</i> | Upstream genomic   | C-328A        |  | 0.342 |
| <i>Or47a</i> | Upstream genomic   | T-327C        |  | 0.342 |
| <i>Or47a</i> | Upstream genomic   | -325 Ins 2bp  |  | 0.211 |
| <i>Or47a</i> | Upstream genomic   | -325 Ins 2bp  |  | 0.132 |
| <i>Or47a</i> | Upstream genomic   | C-323A        |  | 0.342 |
| <i>Or47a</i> | Upstream genomic   | C-320A        |  | 0.237 |
| <i>Or47a</i> | Upstream genomic   | C-320G        |  | 0.105 |
| <i>Or47a</i> | Upstream genomic   | G-319C        |  | 0.342 |
| <i>Or47a</i> | Upstream genomic   | T-317A        |  | 0.342 |
| <i>Or47a</i> | Upstream genomic   | T-314C        |  | 0.342 |
| <i>Or47a</i> | Upstream genomic   | -314 Ins 1bp  |  | 0.342 |
| <i>Or47a</i> | Upstream genomic   | G-308T        |  | 0.342 |
| <i>Or47a</i> | Upstream genomic   | -307 Ins 2bp  |  | 0.342 |
| <i>Or47a</i> | Upstream genomic   | G-303T        |  | 0.342 |
| <i>Or47a</i> | Upstream genomic   | A-302C        |  | 0.342 |
| <i>Or47a</i> | Upstream genomic   | C-300A        |  | 0.132 |
| <i>Or47a</i> | Upstream genomic   | C-299T        |  | 0.342 |
| <i>Or47a</i> | Upstream genomic   | C-299A        |  | 0.105 |
| <i>Or47a</i> | Upstream genomic   | -298 Ins 2bp  |  | 0.342 |

|              |                  |                 |  |       |
|--------------|------------------|-----------------|--|-------|
| <i>Or47a</i> | Upstream genomic | A-294T          |  | 0.342 |
| <i>Or47a</i> | Upstream genomic | T-293C          |  | 0.342 |
| <i>Or47a</i> | Upstream genomic | G-292C          |  | 0.342 |
| <i>Or47a</i> | Upstream genomic | G-288C          |  | 0.342 |
| <i>Or47a</i> | Upstream genomic | T-287A          |  | 0.342 |
| <i>Or47a</i> | Upstream genomic | G-286C          |  | 0.342 |
| <i>Or47a</i> | Upstream genomic | -286 Ins 11bp   |  | 0.237 |
| <i>Or47a</i> | Upstream genomic | -286 Del 21bp   |  | 0.105 |
| <i>Or47a</i> | Upstream genomic | T-276A          |  | 0.342 |
| <i>Or47a</i> | Upstream genomic | A-265C          |  | 0.237 |
| <i>Or47a</i> | Upstream genomic | G-261C          |  | 0.342 |
| <i>Or47a</i> | Upstream genomic | G-253A          |  | 0.342 |
| <i>Or47a</i> | Upstream genomic | -251 Ins 1bp    |  | 0.342 |
| <i>Or47a</i> | Upstream genomic | -249 Ins 10 bp  |  | 0.237 |
| <i>Or47a</i> | Upstream genomic | -249 Ins 4 bp   |  | 0.105 |
| <i>Or47a</i> | Upstream genomic | A-248T          |  | 0.342 |
| <i>Or47a</i> | Upstream genomic | A-246T          |  | 0.342 |
| <i>Or47a</i> | Upstream genomic | T-245A          |  | 0.105 |
| <i>Or47a</i> | Upstream genomic | A-244T          |  | 0.342 |
| <i>Or47a</i> | Upstream genomic | G-242T          |  | 0.342 |
| <i>Or47a</i> | Upstream genomic | G-239T          |  | 0.342 |
| <i>Or47a</i> | Upstream genomic | T-237G          |  | 0.342 |
| <i>Or47a</i> | Upstream genomic | -237 Del 104 bp |  | 0.105 |
| <i>Or47a</i> | Upstream genomic | T-235A          |  | 0.342 |
| <i>Or47a</i> | Upstream genomic | - 235 Ins 9 bp  |  | 0.342 |
| <i>Or47a</i> | Upstream genomic | T-233C          |  | 0.105 |
| <i>Or47a</i> | Upstream genomic | -231 Ins 9 bp   |  | 0.342 |
| <i>Or47a</i> | Upstream genomic | A-227T          |  | 0.342 |
| <i>Or47a</i> | Upstream genomic | C-220A          |  | 0.237 |
| <i>Or47a</i> | Upstream genomic | T-218C          |  | 0.105 |
| <i>Or47a</i> | Upstream genomic | T-212A          |  | 0.263 |
| <i>Or47a</i> | Upstream genomic | C-210A          |  | 0.368 |
| <i>Or47a</i> | Upstream genomic | G-195A          |  | 0.105 |
| <i>Or47a</i> | Upstream genomic | A-190C          |  | 0.237 |
| <i>Or47a</i> | Upstream genomic | A-190T          |  | 0.105 |
| <i>Or47a</i> | Upstream genomic | A-188G          |  | 0.237 |
| <i>Or47a</i> | Upstream genomic | A-188C          |  | 0.105 |
| <i>Or47a</i> | Upstream genomic | -183 Del 2 bp   |  | 0.342 |
| <i>Or47a</i> | Upstream genomic | A-181T          |  | 0.105 |

|              |                  |              |  |       |
|--------------|------------------|--------------|--|-------|
| <i>Or47a</i> | Upstream genomic | T-180G       |  | 0.342 |
| <i>Or47a</i> | Upstream genomic | A-178C       |  | 0.342 |
| <i>Or47a</i> | Upstream genomic | T-176A       |  | 0.342 |
| <i>Or47a</i> | Upstream genomic | C-175T       |  | 0.342 |
| <i>Or47a</i> | Upstream genomic | T-173A       |  | 0.368 |
| <i>Or47a</i> | Upstream genomic | T-169A       |  | 0.368 |
| <i>Or47a</i> | Upstream genomic | -162 Ins 1bp |  | 0.105 |
| <i>Or47a</i> | Upstream genomic | T-155A       |  | 0.105 |
| <i>Or47a</i> | Upstream genomic | -154 Ins 2bp |  | 0.105 |
| <i>Or47a</i> | Upstream genomic | T-152C       |  | 0.368 |
| <i>Or47a</i> | Upstream genomic | G-150A       |  | 0.368 |
| <i>Or47a</i> | Upstream genomic | A-147C       |  | 0.237 |
| <i>Or47a</i> | Upstream genomic | T-144C       |  | 0.368 |
| <i>Or47a</i> | Upstream genomic | T-142G       |  | 0.105 |
| <i>Or47a</i> | Upstream genomic | T-136G       |  | 0.263 |
| <i>Or47a</i> | Upstream genomic | A-132G       |  | 0.263 |
| <i>Or47a</i> | Upstream genomic | A-131G       |  | 0.105 |
| <i>Or47a</i> | Upstream genomic | A-130G       |  | 0.105 |
| <i>Or47a</i> | Upstream genomic | C-129G       |  | 0.105 |
| <i>Or47a</i> | Upstream genomic | C-129A       |  | 0.263 |
| <i>Or47a</i> | Upstream genomic | A-128T       |  | 0.105 |
| <i>Or47a</i> | Upstream genomic | A-128G       |  | 0.263 |
| <i>Or47a</i> | Upstream genomic | A-126T       |  | 0.105 |
| <i>Or47a</i> | Upstream genomic | G-125T       |  | 0.105 |
| <i>Or47a</i> | Upstream genomic | G-124A       |  | 0.105 |
| <i>Or47a</i> | Upstream genomic | -94 Del 6 bp |  | 0.237 |
| <i>Or47a</i> | Upstream genomic | T-91C        |  | 0.368 |
| <i>Or47a</i> | Upstream genomic | C-74G        |  | 0.237 |
| <i>Or47a</i> | Upstream genomic | T-73C        |  | 0.237 |
| <i>Or47a</i> | Upstream genomic | C-72A        |  | 0.105 |
| <i>Or47a</i> | Upstream genomic | T-68G        |  | 0.237 |
| <i>Or47a</i> | Upstream genomic | G-63A        |  | 0.237 |
| <i>Or47a</i> | Upstream genomic | C-52T        |  | 0.105 |
| <i>Or47a</i> | Exon 1           | T39C         |  | 0.342 |
| <i>Or47a</i> | Exon 1           | C123A        |  | 0.053 |
| <i>Or47a</i> | Exon 1           | T168C        |  | 0.158 |
| <i>Or47a</i> | Exon 1           | G195T        |  | 0.158 |
| <i>Or47a</i> | Exon 1           | C198G        |  | 0.079 |
| <i>Or47a</i> | Exon 1           | T231C        |  | 0.342 |

|              |            |                |       |       |
|--------------|------------|----------------|-------|-------|
| <i>Or47a</i> | Exon 1     | A240T          |       | 0.079 |
| <i>Or47a</i> | Exon 1     | T243G          |       | 0.342 |
| <i>Or47a</i> | Exon 1     | C276T          |       | 0.316 |
| <i>Or47a</i> | Intron 1   | T313C          |       | 0.316 |
| <i>Or47a</i> | Intron 1   | C320T          |       | 0.316 |
| <i>Or47a</i> | Intron 1   | C322G          |       | 0.368 |
| <i>Or47a</i> | Intron 1   | C323T          |       | 0.316 |
| <i>Or47a</i> | Intron 1   | T340C          |       | 0.211 |
| <i>Or47a</i> | Exon 2     | T440C          |       | 0.316 |
| <i>Or47a</i> | Exon 3     | G642A          | V176I | 0.158 |
| <i>Or47a</i> | Exon 3     | T653C          |       | 0.289 |
| <i>Or47a</i> | Exon 3     | C668T          |       | 0.158 |
| <i>Or47a</i> | Exon 3     | C831T          |       | 0.158 |
| <i>Or47a</i> | Exon 3     | C845T          |       | 0.158 |
| <i>Or47a</i> | Exon 3     | G881A          |       | 0.474 |
| <i>Or47a</i> | Exon 3     | C887T          |       | 0.447 |
| <i>Or47a</i> | Exon 3     | C902T          |       | 0.447 |
| <i>Or47a</i> | Exon 3     | C947T          |       | 0.132 |
| <i>Or47a</i> | Exon 3     | G974C          |       | 0.079 |
| <i>Or47a</i> | Exon 3     | A986T          |       | 0.316 |
| <i>Or47a</i> | Exon 3     | C998A          |       | 0.079 |
| <i>Or47a</i> | Exon 3     | T1181C         |       | 0.237 |
| <i>Or47a</i> | Exon 3     | T1193C         |       | 0.289 |
| <i>Or47a</i> | Intron 3   | C1234A         |       | 0.421 |
| <i>Or47a</i> | Intron 3   | C1236T         |       | 0.421 |
| <i>Or47a</i> | Intron 3   | 1256 Del 10 bp |       | 0.132 |
| <i>Or47a</i> | Intron 3   | C1274T         |       | 0.368 |
| <i>Or47a</i> | Intron 3   | C1285G         |       | 0.368 |
| <i>Or47a</i> | Intron 3   | C1285T         |       | 0.237 |
| <i>Or47a</i> | Intron 3   | C1286G         |       | 0.368 |
| <i>Or47a</i> | Intron 3   | T1292C         |       | 0.368 |
| <i>Or47a</i> | Exon 4     | T1300C         |       | 0.105 |
| <i>Or47a</i> | Exon 4     | G1309T         |       | 0.053 |
| <i>Or47a</i> | Exon 4     | C1321T         |       | 0.105 |
| <i>Or47a</i> | Exon 4     | A1324G         |       | 0.105 |
| <i>Or47a</i> | Exon 4     | A1336C         |       | 0.158 |
| <i>Or47a</i> | Exon 4 UTR | 1349 Del 2 bp  |       | 0.158 |
| <i>Or47a</i> | Exon 4 UTR | C1357T         |       | 0.158 |
| <i>Or47a</i> | Exon 4 UTR | G1502T         |       | 0.447 |

|              |                    |               |  |       |
|--------------|--------------------|---------------|--|-------|
| <i>Or47a</i> | Exon 4 UTR         | T1514C        |  | 0.079 |
| <i>Or47a</i> | Downstream genomic | T1541G        |  | 0.184 |
| <i>Or47a</i> | Downstream genomic | C1582A        |  | 0.342 |
| <i>Or47a</i> | Downstream genomic | 1633 Del 2 bp |  | 0.158 |
| <i>Or47a</i> | Downstream genomic | 1635 Ins 2bp  |  | 0.395 |
| <i>Or47a</i> | Downstream genomic | 1637 Ins 2bp  |  | 0.368 |
| <i>Or47a</i> | Downstream genomic | C1670T        |  | 0.342 |
| <i>Or47a</i> | Downstream genomic | T1706G        |  | 0.342 |
| <i>Or47a</i> | Downstream genomic | G1731A        |  | 0.447 |
| <i>Or47a</i> | Downstream genomic | T1736G        |  | 0.211 |
| <i>Or47a</i> | Downstream genomic | C1864A        |  | 0.211 |
| <i>Or47a</i> | Downstream genomic | G1877T        |  | 0.184 |
| <i>Or47a</i> | Downstream genomic | A1925G        |  | 0.395 |
| <i>Or47a</i> | Downstream genomic | A1944T        |  | 0.368 |
| <i>Or47a</i> | Downstream genomic | G1982T        |  | 0.079 |
| <i>Or47a</i> | Downstream genomic | A1984G        |  | 0.237 |

<sup>1</sup>The first base of the initiation codon corresponds to position 1. Insertion (Ins) position is listed by the position number of the base located before the insertion and the deletions (Del) listed by the position of the first deleted base. The size of the Ins or Del (base pairs, bp) is indicated after the position number. The most common allele is listed first.

<sup>2</sup>Allele frequencies of the rare allele.
